# Supplementary material for: Postsynaptic Targeting and Mobility of Membrane Surface-Localized hASIC1a
Source: PubMed Central journal article supplement (PMC7870742; doi:10.1007/s12264-020-00581-9), 2020-09-30
Supplement: 12264_2020_581_MOESM2_ESM.pdf [file 12264_2020_581_MOESM2_ESM.pdf]

## Supplementary Video Captions

**Video S1. Changes of hASIC1a-pHluorin fluorescence in response to extracellular pH fluctuations.** After transfection with hASIC1a<sup>-298</sup>pHluorin<sup>299</sup> and mCherry in *Asic1a*<sup>-/-</sup> neurons, live cell imaging with no delay showed pH-dependent changes in pHluorin fluorescence in response to the perfusion of extracellular solutions with different pH values.

**Video S2. Single-particle tracking of surface hASIC1a by ASC06-IgG1-Alexa 488.** *Asic1a*<sup>-/-</sup> neurons transfected with hASIC1a were incubated with ASC06-IgG1-Alexa 488 to label surface hASIC1a. Total internal reflection fluorescent microscope (TIRFM) was used to record lateral mobility of surface hASIC1a. Scanning was performed for 1 to 2 min at a frequency of 20-30 Hz.
